# Supplementary material for: Three-dimensional growth and biomechanical risk progression of abdominal aortic aneurysms under serial computed tomography assessment
Source: PubMed Central journal article supplement (PMC10247735; doi:10.1038/s41598-023-36204-2), 2023-06-07
Supplement: 41598_2023_36204_MOESM1_ESM.pdf [file 41598_2023_36204_MOESM1_ESM.pdf]

## Supplementary Material

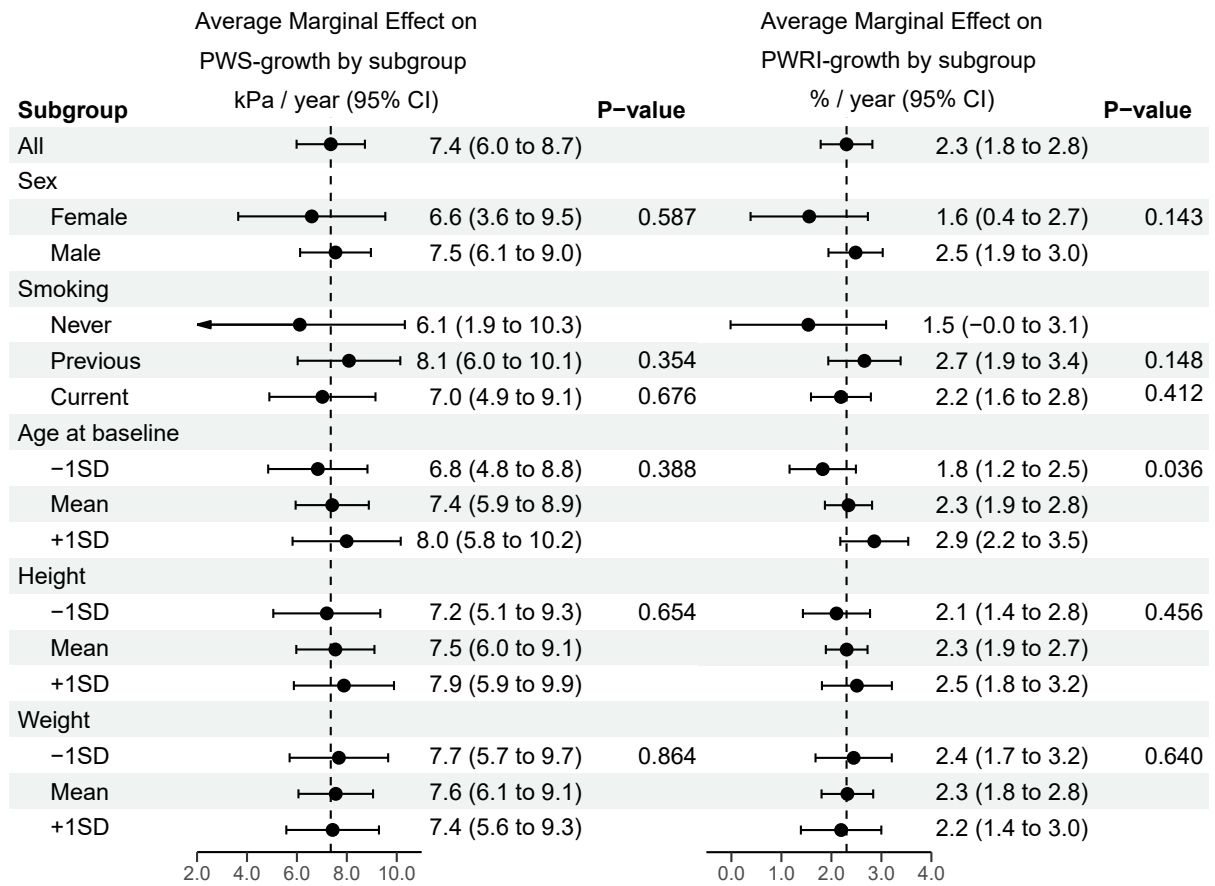

**Supplementary Figure 1.** Growth rates of PWS and PWRI by patient characteristics.

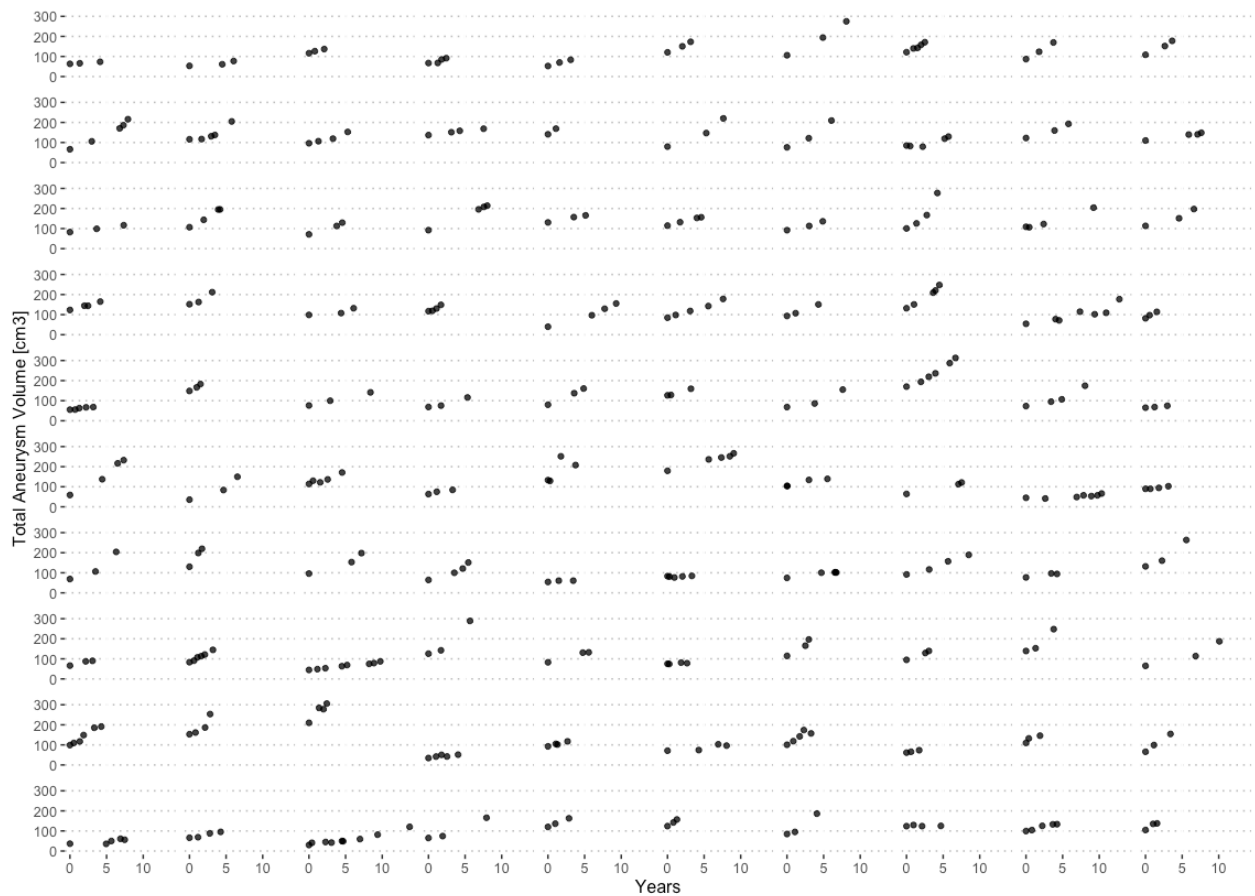

**Supplementary Figure 2.** Total aneurysm volume over time. A single plot represents one patient, and a dot represents one CTA examination. Y axis denotes the maximum aneurysm volume (cm<sup>3</sup>), and the x-axis time (in years) from inclusion into the study.

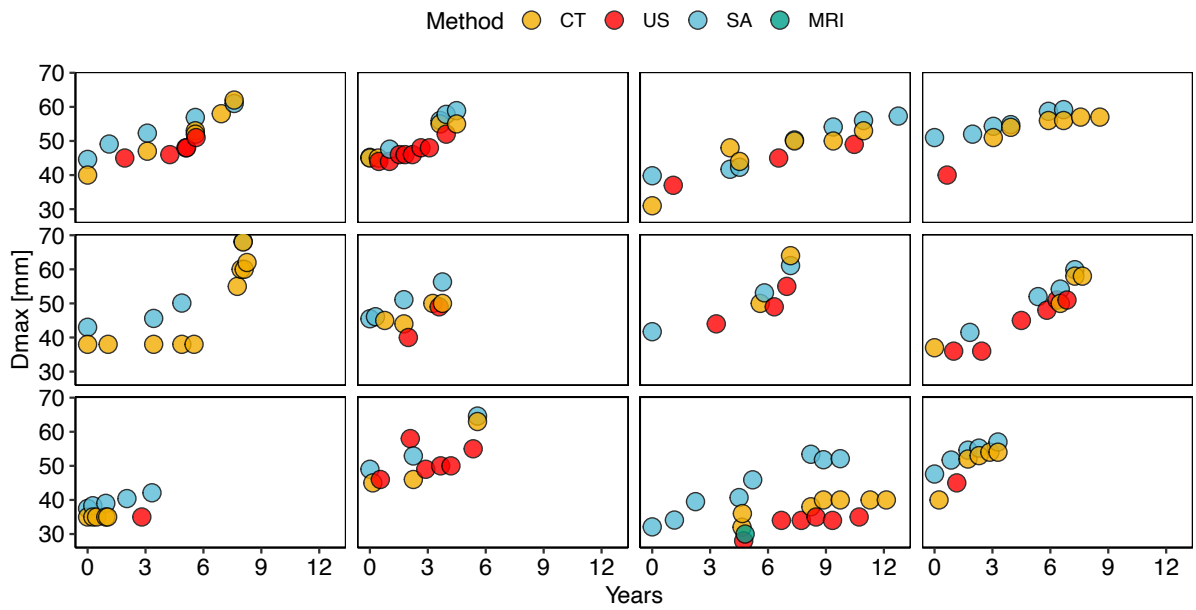

**Supplementary Figure 3.** Diameter measurements for twelve patients over time. Colors indicate CT (computed tomography), US (ultrasound), SA (semi-automatic), and MRI (magnetic resonance imaging).

**Supplementary Table 1.** Mixed effects model of ILT-ratio over time.

| <i>Predictors</i>                                    | <b>ILT ratio (%)</b> |               |                  |
|------------------------------------------------------|----------------------|---------------|------------------|
|                                                      | <i>Estimates</i>     | <i>CI</i>     | <i>p</i>         |
| (Intercept)                                          | 22.25                | 19.39 – 25.11 | <b>&lt;0.001</b> |
| ILT-ratio % /year                                    | 2.63                 | 2.13 – 3.14   | <b>&lt;0.001</b> |
| Observations                                         | 384                  |               |                  |
| Marginal R <sup>2</sup> / Conditional R <sup>2</sup> | 0.166 / 0.919        |               |                  |

**Supplementary table 2.** Regression model of peak wall stress and peak wall rupture index as estimated by ILT ratio and aneurysm volume

| <i>Predictors</i>                                       | <b>Peak Wall Stress (kPa)</b> |                |                 | <b>Peak Wall Rupture Index (%)</b> |               |                 |
|---------------------------------------------------------|-------------------------------|----------------|-----------------|------------------------------------|---------------|-----------------|
|                                                         | <i>Estimates</i>              | <i>95 % CI</i> | <i>p</i>        | <i>Estimates</i>                   | <i>95% CI</i> | <i>p</i>        |
| (Intercept)                                             | 83.58                         | 67.44 – 99.72  | <b>&lt;0.01</b> | 9.47                               | 5.80 – 13.15  | <b>&lt;0.01</b> |
| ILT-ratio (%)                                           | 33.19                         | -10.84 – 77.23 | 0.14            | 6.92                               | -4.08 – 17.93 | 0.22            |
| Aneurysm Volume (cm <sup>3</sup> )                      | 1.16                          | 1.03 – 1.29    | <b>&lt;0.01</b> | 0.25                               | 0.22 – 0.29   | <b>&lt;0.01</b> |
| ILT-ratio *<br>Aneurysm volume                          | -1.25                         | -1.55 – -0.96  | <b>&lt;0.01</b> | -0.19                              | -0.26 – -0.12 | <b>&lt;0.01</b> |
| Observations                                            | 384                           |                |                 | 384                                |               |                 |
| Marginal R <sup>2</sup> /<br>Conditional R <sup>2</sup> | 0.609 / 0.893                 |                |                 | 0.216 / 0.961                      |               |                 |
